# Supplementary material for: NK Cell-Dependent Antibody-Mediated Immunotherapy Is Improved In Vitro and In Vivo When Combined with Agonists for Toll-like Receptor 2 in Head and Neck Cancer Models
Source: MDPI journal article supplement (doi:10.3390/ijms222011057), 2021-10-14
Supplement: s1 [file s1]

# NK cell-dependent antibody-mediated immunotherapy is improved *in vitro* and *in vivo* when combined with agonists for Toll-like receptor 2 in head and neck cancer models

## Supplementary figure S1

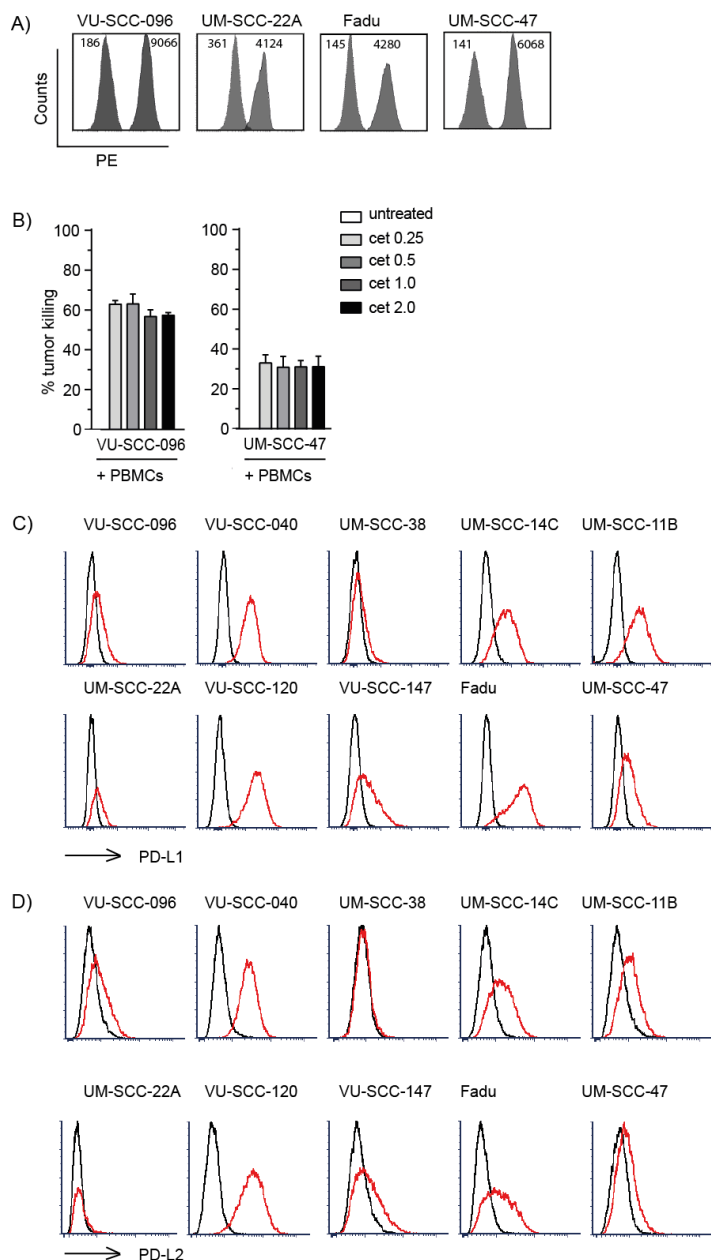

**Cetuximab-mediated killing of HNSCC cells by immune cells.** (A) EGFR expression on 4 HNSCC cell lines analyzed by flow cytometry. First peak represents staining with secondary PE-labeled antibody only. Second peak represents staining with cetuximab (0.25 µg/ml) and secondary PE-labeled antibody. Graph indicates median fluorescence intensity. (B) ADCC experiments with the HNSCC cell lines VU-SCC-096 and UM-SCC-47 were performed with PBMCs (E:T ratio 60:1, 24h incubation) in the presence of different concentrations of cetuximab (0.0-2.0 µg/ml). Bars indicate mean ± SD, n≥3. (C-D) PD-L1 (C) and PD-L2 (D) expression on HNSCC cell lines analyzed by flow cytometry. Black line represents isotype control staining, red line represents PD-L1 (C) or PD-L2 (D) staining. Graph indicates median fluorescence intensity.

## Supplementary figure S2

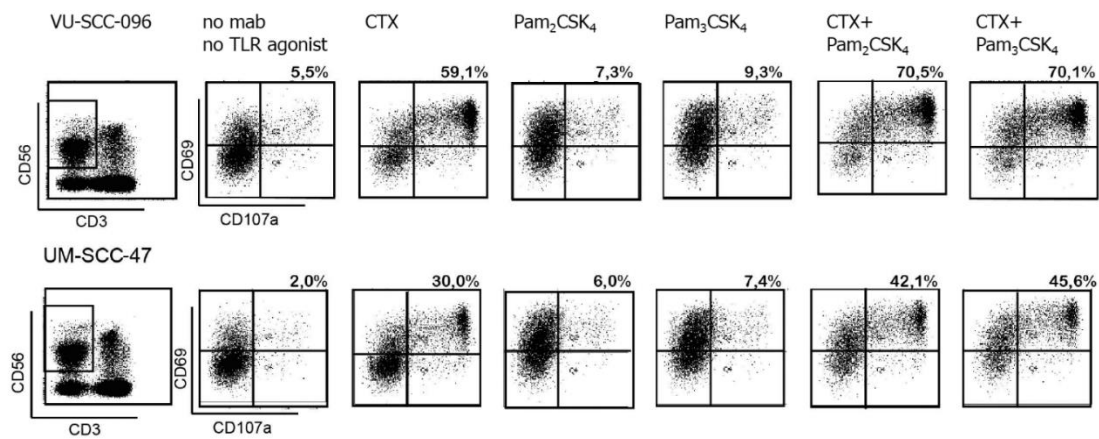

**TLR2 agonists enhance NK cell cytotoxicity upon cetuximab stimulation.** PBMCs were harvested from ADCC experiments with the HNSCC cell lines VU-SCC-096 (upper panels) and UM-SCC-47 (lower panels) after 24h incubation and analyzed for percentage (%) CD69 (activation marker) and CD107a (degranulation marker) double positive NK cells (gated as CD3-CD56+ cells) (upper right square). ADCC conditions included no stimulation (no mAb, no TLR agonist), cetuximab (CTX), Pam2CSK4 or Pam3CSK4. Combined treatments of cetuximab with TLR2 agonists are indicated by CTX + Pam2CSK4 or CTX + Pam3CSK4. N>3.

## Supplementary figure S3

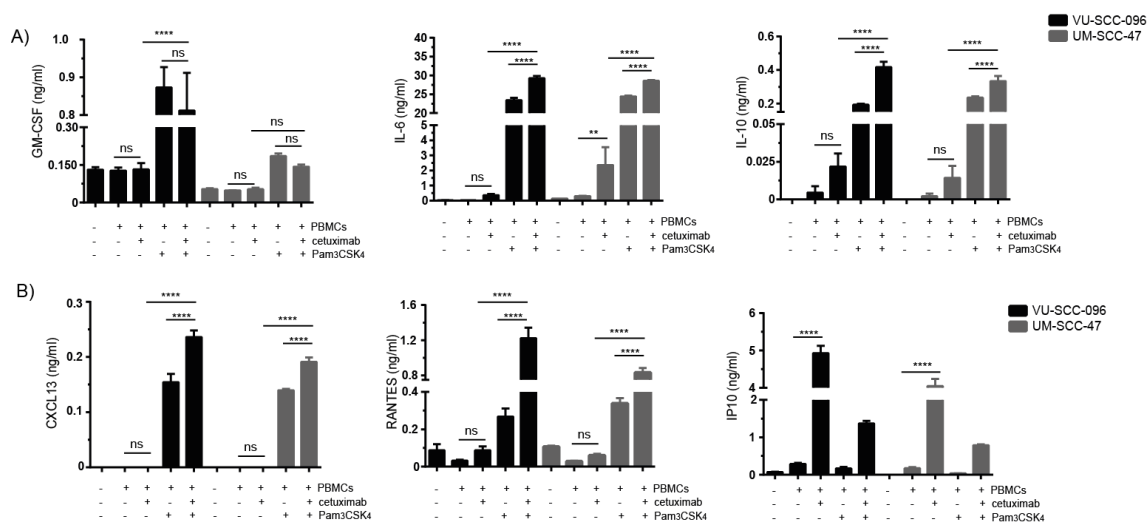

**Secretory profile of PBMCs stimulated with cetuximab and a TLR2 agonist.** ADCC experiments with the HNSCC cell lines VU-SCC-096 (black bars) and UM-SCC-47 (grey bars) were performed with PBMCs in the absence or presence of cetuximab (0.5  $\mu\text{g/ml}$ ) and/or Pam3CSK4 (5  $\mu\text{g/ml}$ ). After 24h supernatants were harvested and used for **(A)** cytokine and **(B)** chemokine analysis. Bars represent mean  $\pm$  SD,  $n=2$ , \* $p<0.05$  is considered significant.

# Supplementary figure S4

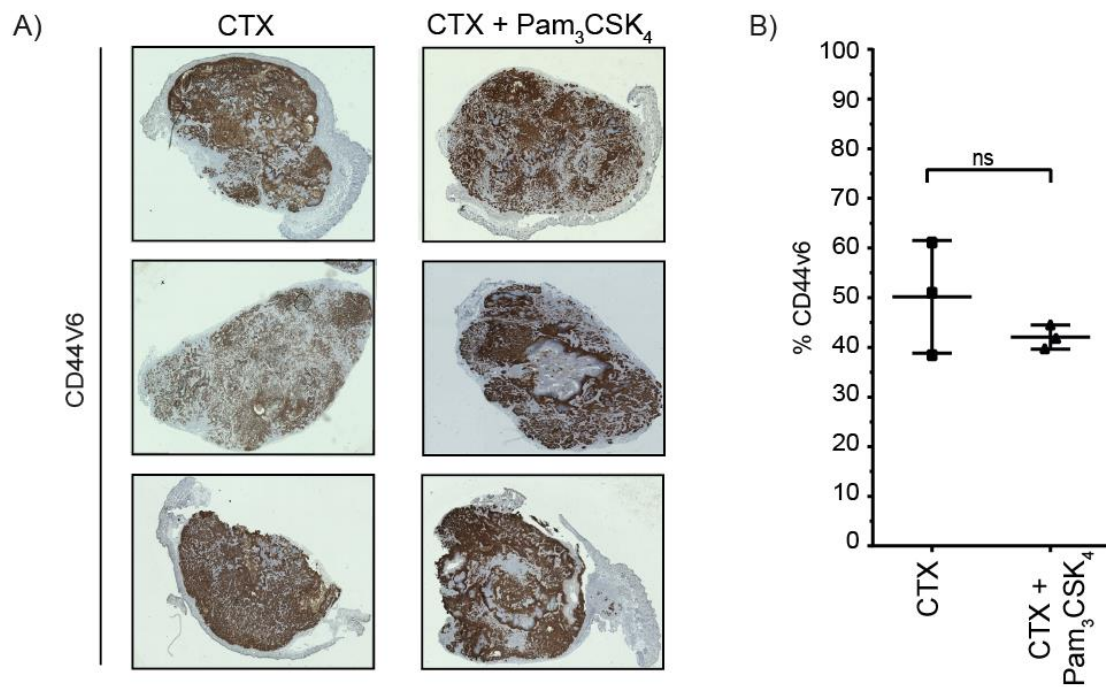

**Treatment of tumor-bearing mice with cetuximab and a TLR2 agonist.** (A) Nude mice (3/group) were subcutaneously injected with UM-SCC-47 cells in both flanks. Tumors were harvested at day 11 after treatment (cetuximab or cetuximab with Pam3CSK4s at day 0 and 4), n=1. Tumors were stained for the presence of CD44v6 (tumor cell marker, brown staining) and counterstained with haematoxylin. (B) Percentage (%) CD44v6 staining within the tumor area, \*p<0.05 is considered significant.

**Supplementary table S1**

| <i>Patient no.</i> | <i>Gender</i> | <i>Age at diagnosis</i> | <i>Subsite</i>      | <i>TNM stage</i> |
|--------------------|---------------|-------------------------|---------------------|------------------|
| pt607              | M             | 77                      | Glottic larynx      | T3N0             |
| pt608              | F             | 74                      | Floor of mouth      | T4N0             |
| pt610              | M             | 54                      | Floor of mouth      | T2N0             |
| pt617 <sup>A</sup> | M             | 73                      | Base of tongue      | T2N2b            |
| pt618              | M             | 69                      | Glottic larynx      | T4aN0            |
| pt626              | F             | 66                      | Floor of mouth      | T4aN0            |
| pt628              | F             | 74                      | Piriform sinus      | T4bN0            |
| pt633              | M             | 73                      | Base of tongue      | T4bN0            |
| pt640 <sup>A</sup> | M             | 54                      | Tonsil              | T4aN1            |
| pt664              | M             | 54                      | Oropharynx          | T3N0             |
| pt665              | F             | 63                      | Supraglottic larynx | T3N0             |
| pt687              | M             | 51                      | Floor of mouth      | T2N0             |
| pt688              | M             | 53                      | Supraglottic larynx | T4aN2b           |
| pt693              | M             | 66                      | Oropharynx          | T4bN0            |
| pt695              | M             | 72                      | Hypopharynx         | T3N2b            |
| pt698              | M             | 58                      | Piriform sinus      | T2N1             |

**Patient and tumor characteristics.** <sup>A</sup> HPV16+ tumors.
